# Supplementary material for: Impact of NRSN2 Deficiency on Memory: Disruption of Excitatory Synaptic Plasticity Linked to Reduced Expression of NMDA Receptor Subunits and impaired LTP in the hippocampus
Source: Research Square preprint supplement (doi:10.21203/rs.3.rs-7323201/v1), 2025-09-01
Supplement: Supplementary file 1 [file 451fe8e0cf171df08ce2c753.docx]

**Supplemental Materials**

**Methods**

**Open field test (OF)**

The apparatus (40×40×30 cm3) was illuminated with overhead lighting. Each subject was placed in the center for 5 min. The movement time, total distance traveled and distance traveled in the center (1/4 area) were video-recorded and analyzed with EthoVison XT v11.5 (Noldus, USA). The open field arena and surroundings were cleaned with 70% ethanol to remove odors between tests.

**Y maze (YM)**

The Y maze apparatus consisted of three identical arms at a 120° angle from each other. The mouse behavior was recorded for 5 min and analyzed with EthoVison XT v11.5 (Noldus, USA). Alternation behavior was defined as consecutive entries into each of the three different arms without repetition. The percentage of spontaneous alternation was calculated as follows: the number of spontaneous alternations (entries into three different arms consecutively) divided by the total number of arm entries – 2 ×100.

**Rotarod test (RT)**

A mouse was placed on a drum (3 cm diameter; Ugo Basile, Italy) rotating at 5 rpm for 5 min to habituate to the rotarod, and then the rotation of the rotarod was accelerated from 5 to 40 rpm over a 5-min period. The speed at fall of each mouse was measured. The mice were trained for two consecutive days and received three trials per day at 10-min intervals between trials.

**Gait analysis (GA)**

The mice were placed at the starting point on one side of the channel (Noldus Catwalk XT, USA) and allowed to explore the channel for 5 minutes to adapt it. The mice were placed in the Catwalk instrument trail for gait detection. 5-7 complete gaits were collected from each mouse and analyzed with Catwalk 10.0.

**Morris water maze (MWM)**

For the Morris water maze test, a circular stainless-steel pool (120 cm in diameter and 75 cm in height) was placed in a room and filled with water to a height of 30 cm (25 ± 2 °C). The procedure consisted of 2 days of visible platform test, 4 days of hidden platform tests and a probe test. In each test, mice were placed into water randomly from 3 starting positions (Opposite, Left, and Right), facing to the pool wall. In the visible platform test (V1d and V2d), a platform was placed at the center in one of four quadrants（the target quadrant, Target）and exposed 1cm above the water surface. All mice stayed on the platform for 10 s before being removed. Mice failing to escape within 90 s were manually guided to the platform. In the hidden platform test (H3d-H6d), the platform was submerged 1 cm below the water surface. The mice were trained in a series of three hidden platform trials per day. Mice failing to escape within 90 s were manually guided to the platform. After 4 days hidden platform training, a probe test was conducted. In the probe test, the platform was removed from the pool. Each mouse could swim in the maze for 90 s. The image of the mouse was recorded by a video camera suspended above the pool and analyzed with a video track system.

**Novel object recognition test (NOR)**

The novel object recognition test was conducted in an open field apparatus (50×50×40 cm3). One day before the experiment day, the subject mouse was habituated to the arena for 30 min. In the training stage, the mouse could explore two identical objects in the open field for 5 min. One hour later, the test stage was performed for recognition memory. In this stage, one of the objects was replaced by another novel object, in different shape, and the exploration time in 5 min for one novel object (N) and one familiar object (F) was measured manually. The discrimination index was calculated as time in exploring N / (time in exploring N + time in exploring F). The open field arena and surroundings were cleaned with 70% ethanol to remove odors between tests.

**Fear conditioning (FC)**

The fear conditioning test was conducted in a chamber surrounded by a sound-attenuated chamber. The mice were moved to the testing room for environment adaptation before the testing. This test consisted of a conditioning trial and a contextual trial. At conditioning trial (6 min session), the mice were placed in a conditioning chamber equipped with a stainless-steel grid floor, which was wired to a shock generator, and could explore freely for 3 min. Subsequently, the mice were fear-conditioned to the training context with foot shocks (2 second, 0.3 A), given after 18 s 3000 Hz sound and then moved freely for 2 min. Repeated the above steps 5 times. We assessed the conditioned fear response for 6 minutes in the same conditioning chamber 24 h, 3 d and 1 week after the conditioning trial. For the first 180 seconds, no stimulation was given to the mice, and they could move freely. For the last 180 seconds, a conditioned stimulus of 3000 Hz sound was given and the time exhibiting a freezing response was measured as an index of fear memory.

**Passive avoidance (PA)**

The passive avoidance test was conducted in the instrument consist of a light chamber and a dark chamber. This test included a conditioning trial and a contextual trial. On the day before the conditioning trial, the mice could freely shuttle between the light and dark chambers for 10 minutes to habituate to the arena. At conditioning trial (10 min session), the mouse was placed in the light chamber and could freely shuttle between the light and dark chambers for ten minutes. When the mouse enters the dark chamber, it was immediately given a 300 mA foot shock for 2 seconds. At contextual trial, the mouse was placed in the light chamber and could freely shuttle between the light and dark chambers without foot shock 24 h, 3 d and 1 week after the conditioning trial for ten minutes. The latency to enter the dark chamber and time spent in the dark chamber within 10 minutes was recorded.

**Golgi staining**

Briefly, 4-week-old mouse brains were dissected to obtain tissue blocks containing the hippocampi. and fix brain blocks in 4% paraformaldehyde solution for more than 24 hours. The brain blocks were gently rinsed with PBS several times, cut into 2-3mm thick brain tissue blocks, placed in in Golgi staining solution and stored in the dark at RT for 14 days. After soaking for 48 hours, change the new staining solution, and then change the new staining solution every 3 days. The brains were transferred into 15% sucrose solution at 4℃ and in the dark for 1 day. Then the brains were transferred into 30% sucrose solution at 4℃ and in the dark for 2 days. The tissue block was discarded, rinsed with distilled water for 1 minute, treated with concentrated ammonia solution for 45 minutes, rinsed with distilled water for 1 minute, treated with fixative for 45 minutes, and rinsed with distilled water for 1 minute. Finally, the brains were transferred into 30% sucrose solution at 4℃ and in the dark for 2-3 days until the residual water was driven from the tissues, rapidly frozen in liquid nitrogen and stored at −80°C. A cryostat at −22℃ to −20℃ (CM1950, Leica, Germany) was used to obtain 100 μm thick coronal slices.

Neurons and dendrites selection: Select individual neurons isolated from neighboring neurons and with clear morphology. Select dendrites with a length of 80-100 μm that were fully immersed and had no interactions with other dendrites. Dendritic spine density was measured 20 μm away from the cell body. Morphometric reconstruction and calculation were performed using Fiji (NIH, USA). The spine density was defined as the average number of spines per 10 microns of dendritic length.

Sholl analysis: The complexity of dendritic arbors of Golgi staining-labeled CA1 pyramidal neurons and cerebellar Purkinje cell was assessed by means of the Sholl analysis with Simple Neurite Tracer Fiji plugin. All Sholl analyses were carried out at 10 μm intervals to a maximum radius of 100 μm. The number of dendrite intersections against the radial distance from soma was quantified automatically by the software. On average, three to four neurons per animal from three rats were randomly selected for Sholl analysis.

**Electrophysiology**

Whole-cell patch clamp recordings were performed on hippocampal CA1 pyramidal neurons and cerebellar Purkinje cells. Animals were decapitated, and brains were rapidly removed. Brain slices (300 μm) were prepared using a vibratome (RM2235, Leica, Germany) vibrating at 0.18 mm/s in the following cutting solution: 93 mM NMDG, 20 mM HEPES, 25 mM glucose, 30 mM NaHCO3, 10 mM MgSO4, 2.5 mM KCl, 1.2 mM NaH2PO4, 0.5 mM CaCl2, 12 mM NAC, 2 mM Thiourea, 5 mM Na-ascorbate and 3 mM Na-pruvate. After sectioning slices were incubated for at least 30 min at 33℃ in a recovery solution containing 126 mM NaCl, 18 mM NaHCO3, 1.3 mM MgSO4, 2.5 mM KCl, 1.2 mM NaH2PO4, 1.2 mM CaCl2 and 11 mM glucose. Slices were subsequently maintained at room temperature until use. All solutions were continuously aerated with 95% O2/5% CO2.

Whole-cell recordings were obtained using glass pipettes (4 to 6 MΩ) filled with an internal solution containing 140 mM K-gluconate, 2 mM MgSO4, 1 mM EGTA4, 10 mM HEPES, 0.1 mM Na3-GTP (guanosine 5’-triphosphate), 2 mM CaCl2 and 2 mM Na2-ATP (adenosine 5’-triphosphate), adjusted to a pH of 7.2 - 7.3. For sEPSCs, neurons were voltage-clamped at -70 mV. The external solution for sEPSCs recordings contained 100 μM picrotoxin to block GABAA receptor mediated currents. For sIPSCs, neurons were voltage-clamped at 10 mV. The external solution for sIPSCs recordings contained 50 μM 2-amino-5-phosphonopentanoic acid (AP5) and 10 μM 6-cyano-2,3-dihydroxy-7-nitroquinoxaline (CNQX) to block NMDAR and AMPAR receptor synaptic currents, respectively.

Recordings were obtained using a Multicamp 700B amplifier, and digitized with an A/D converter (Digidata 1440A, Molecular Devices). Signals were acquired using pClamp 10 and analyzed with Clampfit 10.5.

Long term potentiation (LTP) recording: Infrared differential interference contrast (IR-DIC) microscopy was used to visualize the hippocampal region in brain slices. A stimulation electrode was placed on the axons of CA3 neurons, while a glass recording electrode was positioned on the dendrites of CA1 neurons for stimulation and recording. LTP was induced using theta-burst stimulation (TBS), which consisted of four theta epochs, each comprising ten trains of 100 Hz pulses delivered at 5 Hz After TBS, baseline stimulation was resumed, and recordings were conducted for 60 minutes. An input-output curve was generated by applying stimulation at intensities ranging from 0 to 0.8 mA. LTP magnitude was determined by calculating the ratio of the average fEPSP slope after TBS to the average fEPSP slope recorded during the 20 minutes preceding TBS.

**Supplementary Results**

**
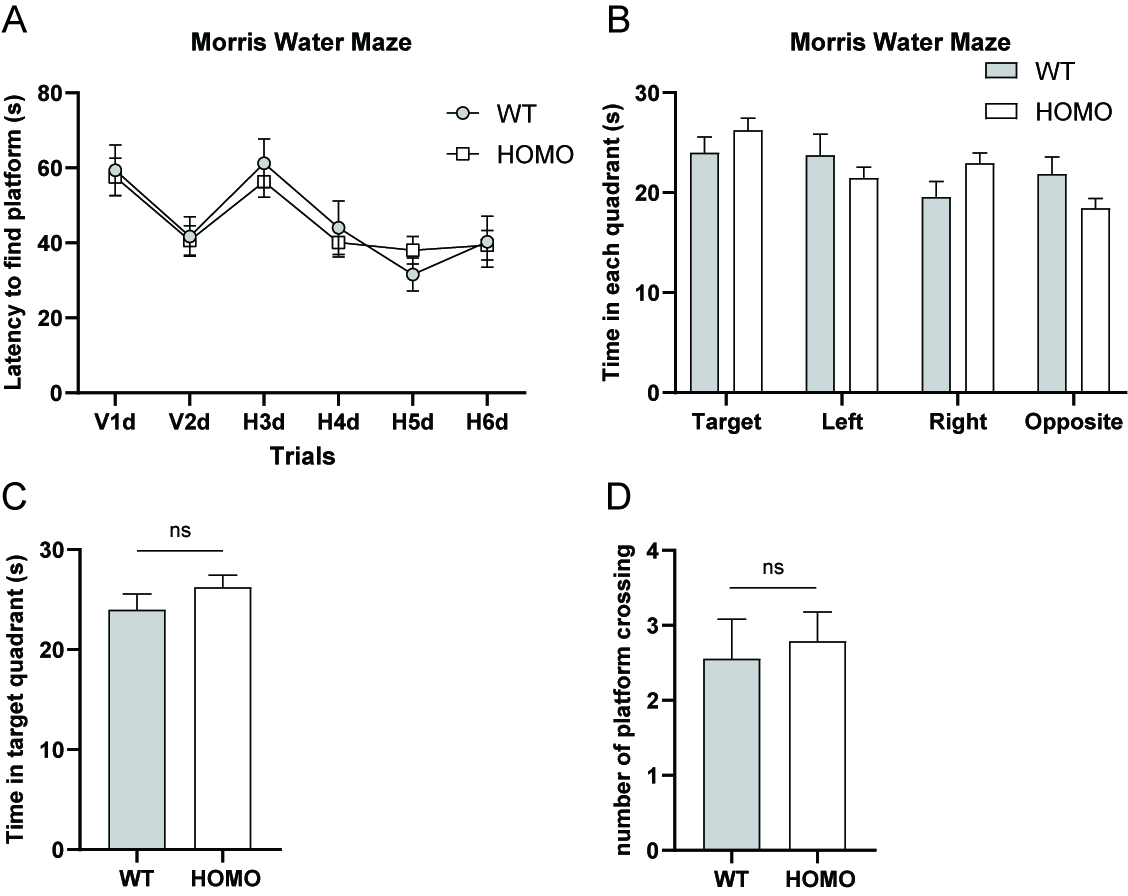
**

**Supplementary Figure 1** **The** **Morris water maze test of 4-week-old WT and KO mice.** **A** The latency to reach the hidden platform during a 6-day training period for 4-week-old WT and KO mice in the MWM test. V1d indicates “visible platform at Day 1.” H3d indicates “Hidden platform at Day 3.” (WT n=6, HOMO n=11). **B** The time spent in each of the 4 quadrants on day 7 for 4-week-old mice in the MWM test. Target indicates “the Target quadrant where the platform was set.” Opposite indicates “the Opposite quadrant to the target quadrant.” Left indicates “the Left quadrant of the target quadrant.” Right indicates “the Right quadrant of the target quadrant.” (WT n=6, HOMO n=11). **C** The time spent in each of the Target quadrant on day 7 for 4-week-old mice in the MWM test (WT n=6, HOMO n=11). **D** The number of platform- crossing on day 7 for 4-week-old mice in the MWM test (WT n=6, HOMO n=11). HOMO: Homozygous *Nrsn2* knockout mice; KO: knockout.
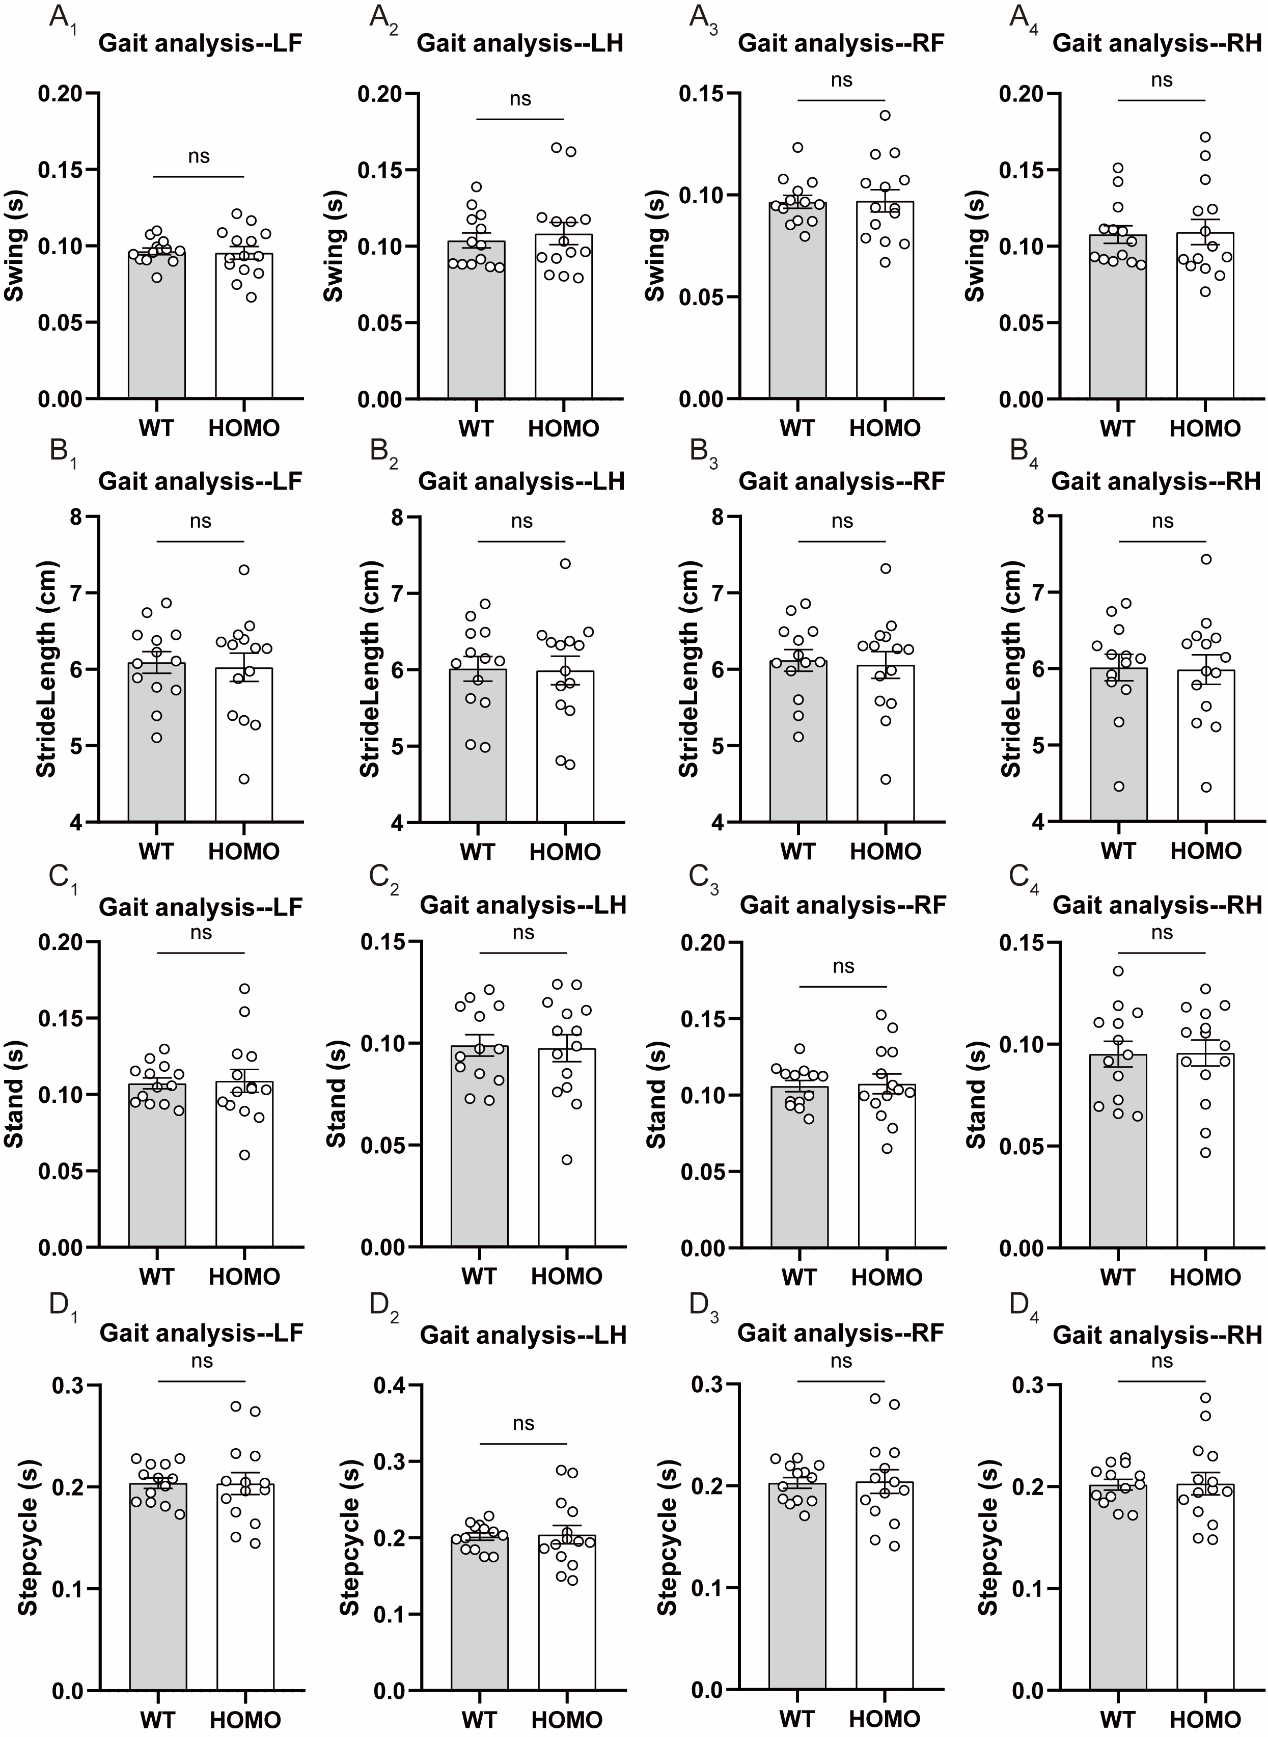


**Supplementary Figure 2 The gait analysis of 4-week-old WT and KO mice. A1-A4** The swing duration of 4-week-old WT and KO mice’s left forefoot (LF)/left hind foot (LH)/right forefoot (RF)/right hind foot (RH) in Gait analysis (WT n=13, HOMO n=14). **B1-B4** The stride length of 4-week-old WT and KO mice’s left forefoot (LF)/left hind foot (LH)/right forefoot (RF)/right hind foot (RH) in Gait analysis (WT n=13, HOMO n=14). **C1-C4** The stand duration of 4-week-old WT and KO mice’s left forefoot (LF)/left hind foot (LH)/right forefoot (RF)/right hind foot (RH) in Gait analysis (WT n=13, HOMO n=14). **D1-D4** The step cycle of 4-week-old WT and KO mice’s left forefoot (LF)/left hind foot (LH)/right forefoot (RF)/right hind foot (RH) in Gait analysis (WT n=13, HOMO n=14). The data are presented as the mean ± s.e.m. *P < 0.05, **P < 0.01, ***P < 0.001 (Unpaired t-test). HOMO: Homozygous *Nrsn2* knockout mice; KO: knockout.


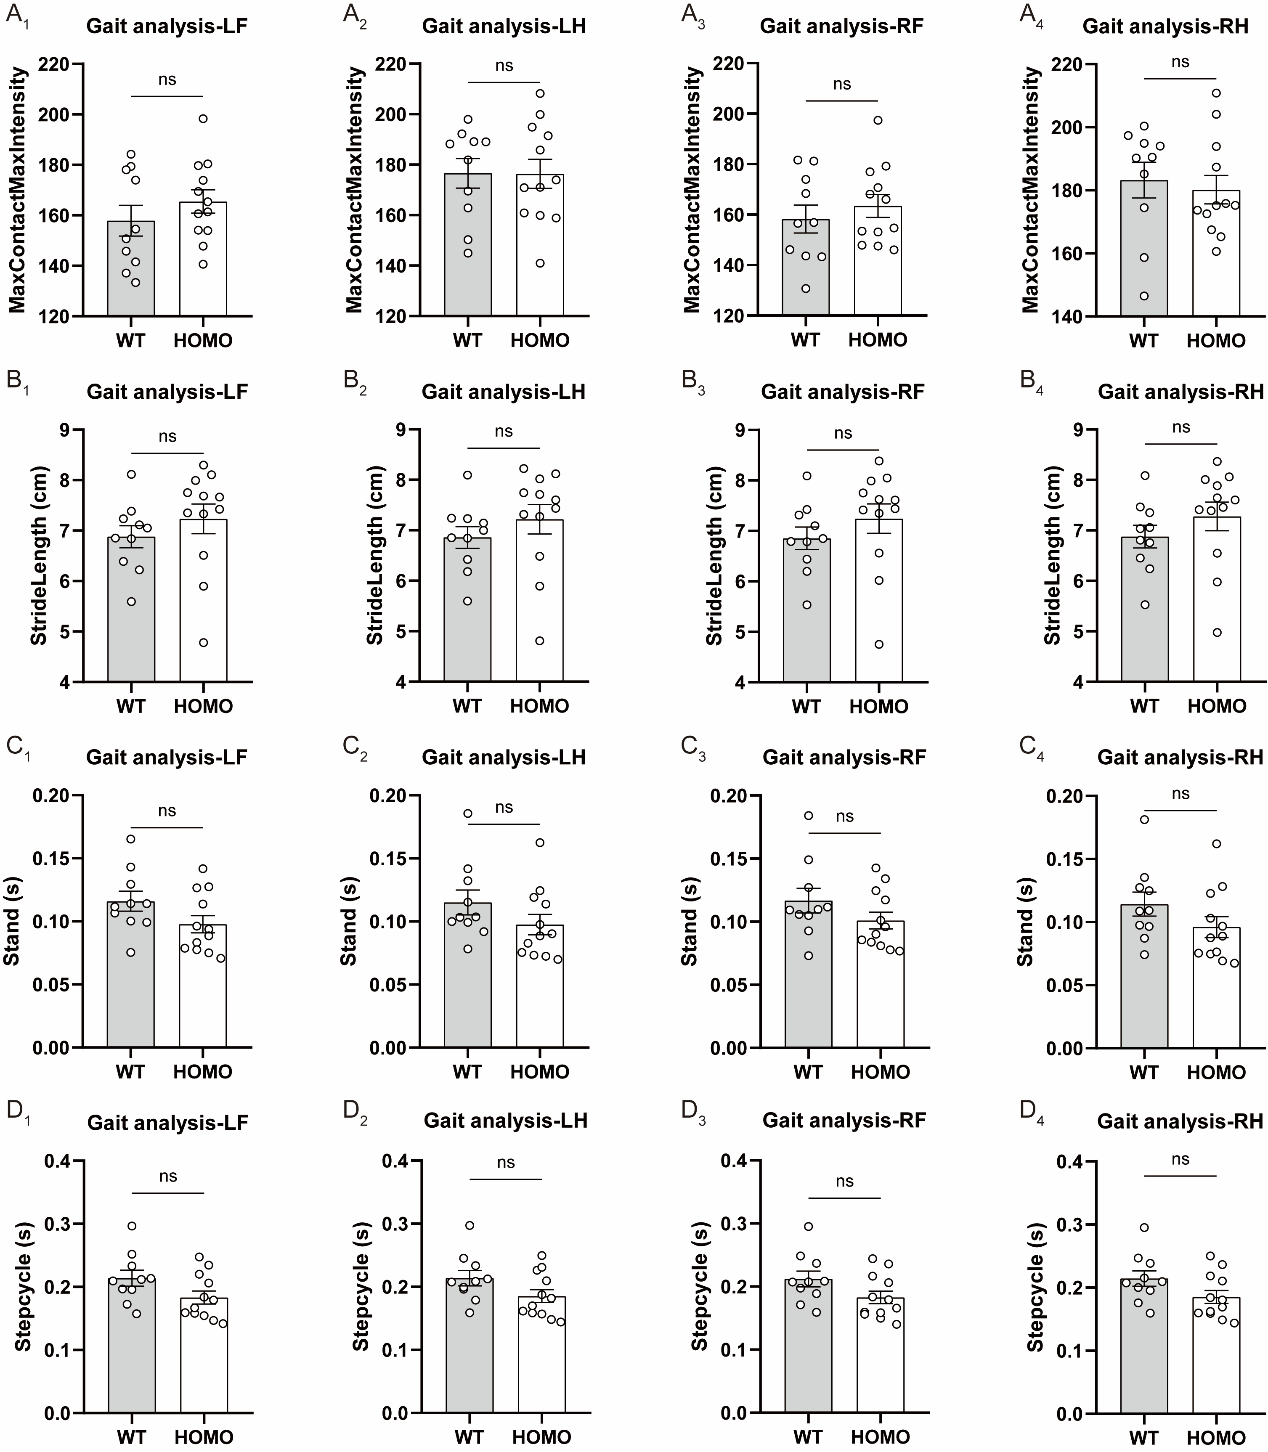
**Supplementary Figure 3 The gait analysis of 8-week-old WT and KO mice. A1-A4** The max contact intensity of 8-week-old WT and KO mice’s left forefoot (LF)/left hind foot (LH)/right forefoot (RF)/right hind foot (RH) in Gait analysis (WT n=10, HOMO n=12). **B1-B4** The stride length of 8-week-old WT and KO mice’s left forefoot (LF)/left hind foot (LH)/right forefoot (RF)/right hind foot (RH) in Gait analysis (WT n=10, HOMO n=12). **C1-C4** The stand duration of 8-week-old WT and KO mice’s left forefoot (LF)/left hind foot (LH)/right forefoot (RF)/right hind foot (RH) in Gait analysis (WT n=10, HOMO n=12). **D1-D4** The step cycle of 8-week-old WT and KO mice’s left forefoot (LF)/left hind foot (LH)/right forefoot (RF)/right hind foot (RH) in Gait analysis (WT n=10, HOMO n=12). The data are presented as the mean ± s.e.m. *P < 0.05, **P < 0.01, ***P < 0.001 (Unpaired t-test). HOMO: Homozygous *Nrsn2* knockout mice; KO: knockout.
